# Supplementary material
Source: PubMed Central journal article supplement (PMC2756882)
Supplement: supp_29_20_5455__1.pdf [file supp_29_20_5455__1.pdf]

# Glover Fig S1

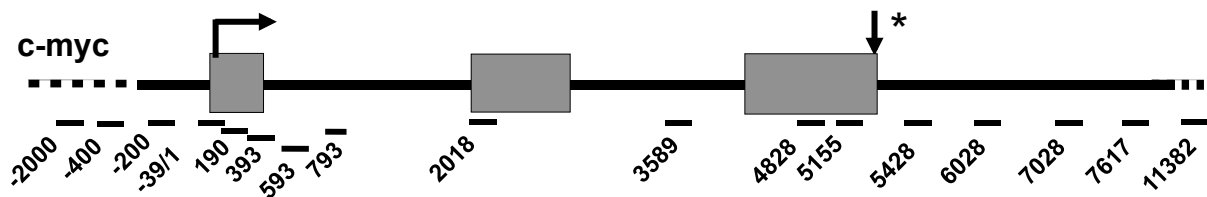

**A**

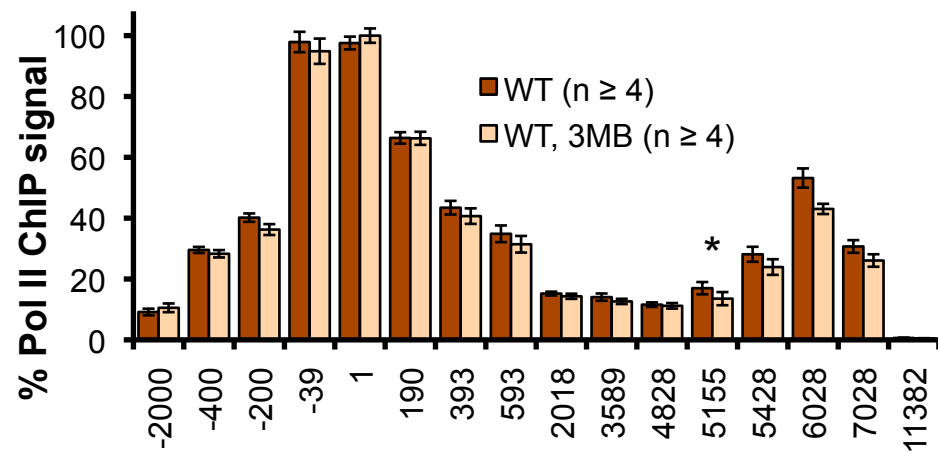

**B**

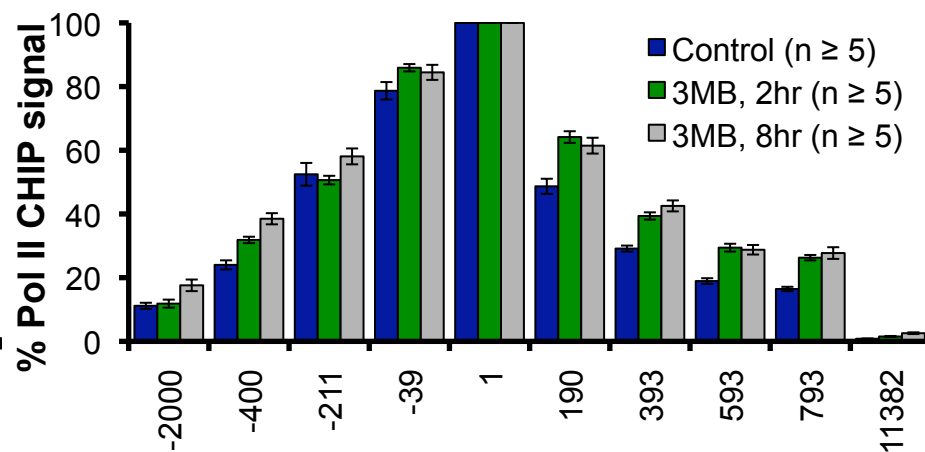

**C**

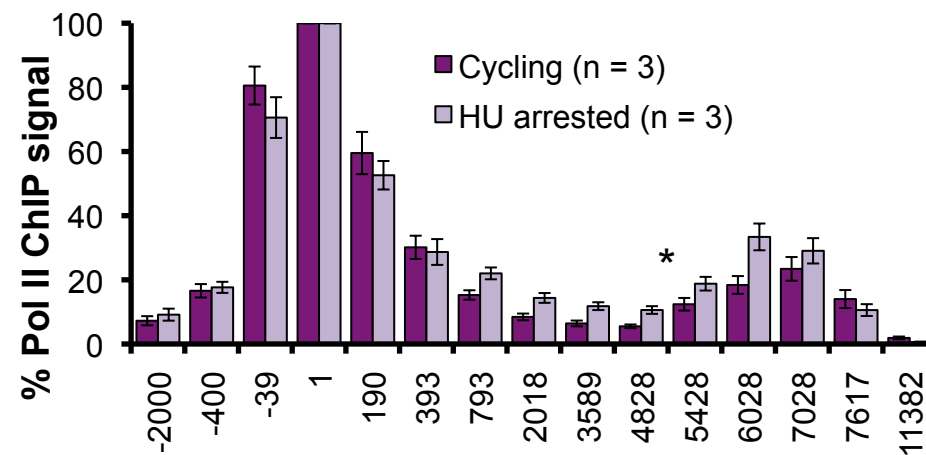

# Glover Fig S2

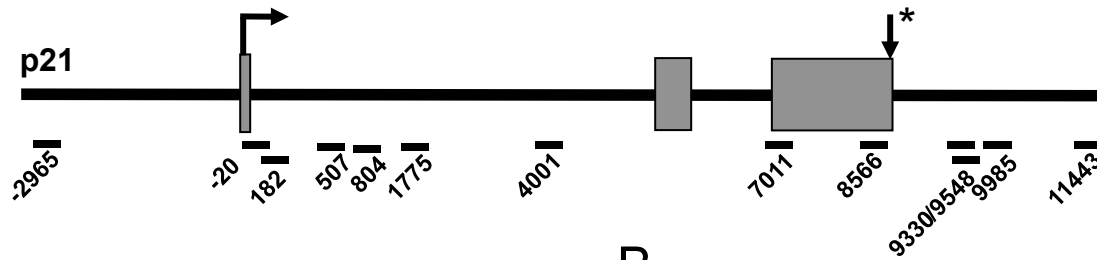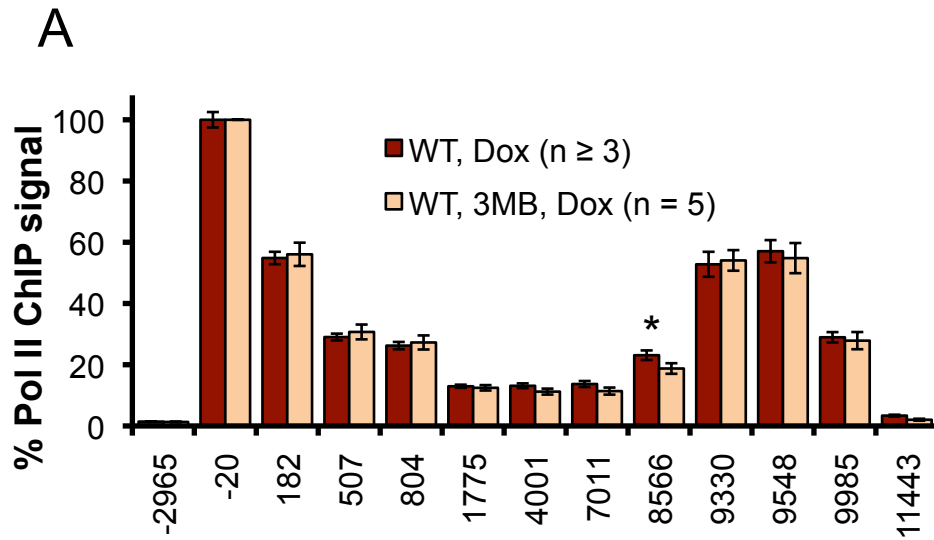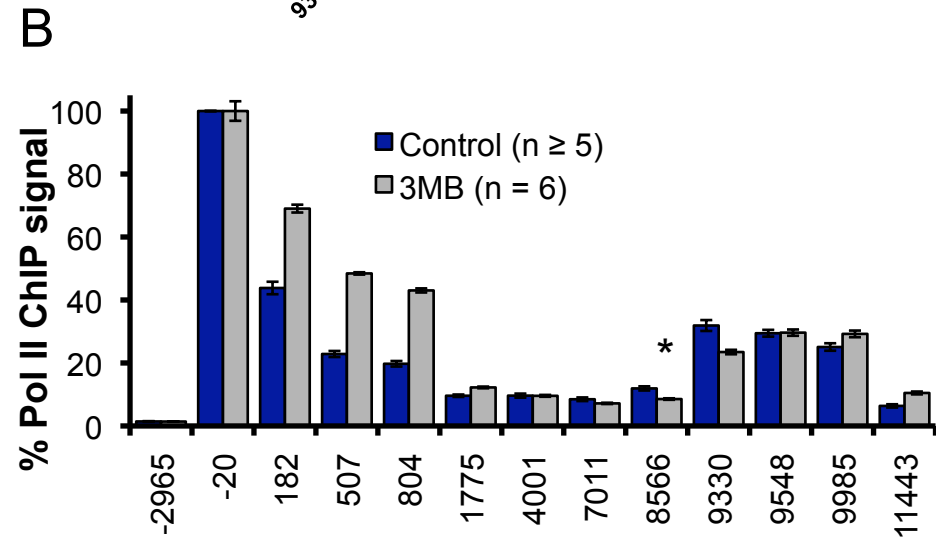

# Glover Fig. S3

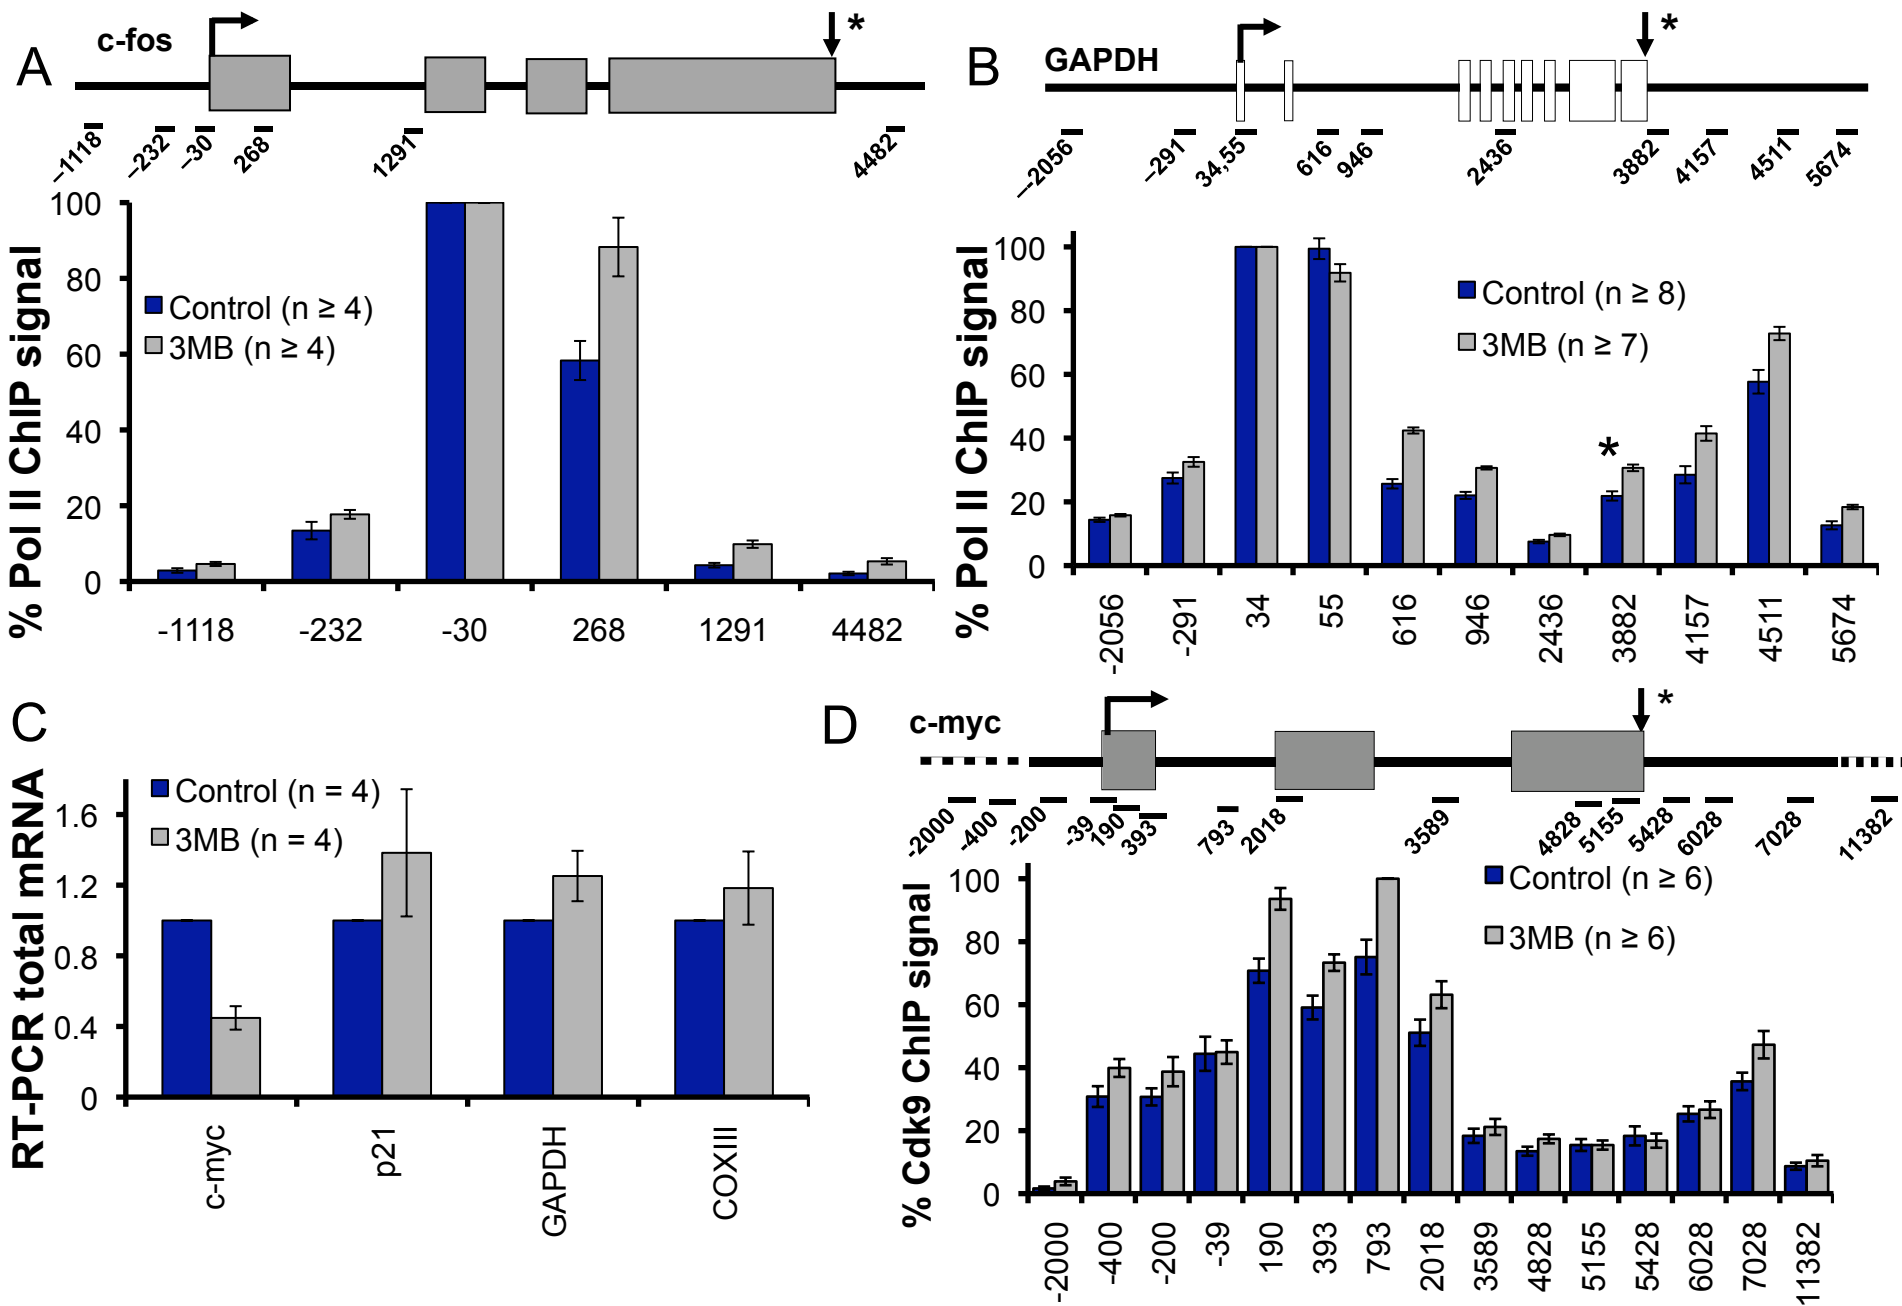

# Glover Fig. S4

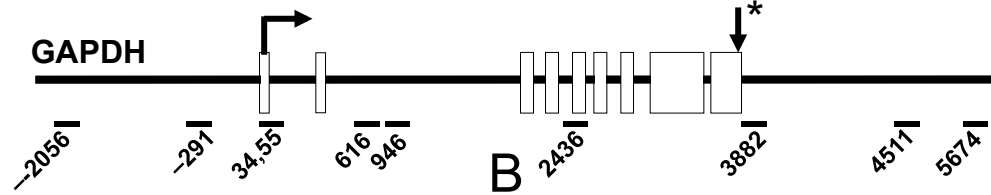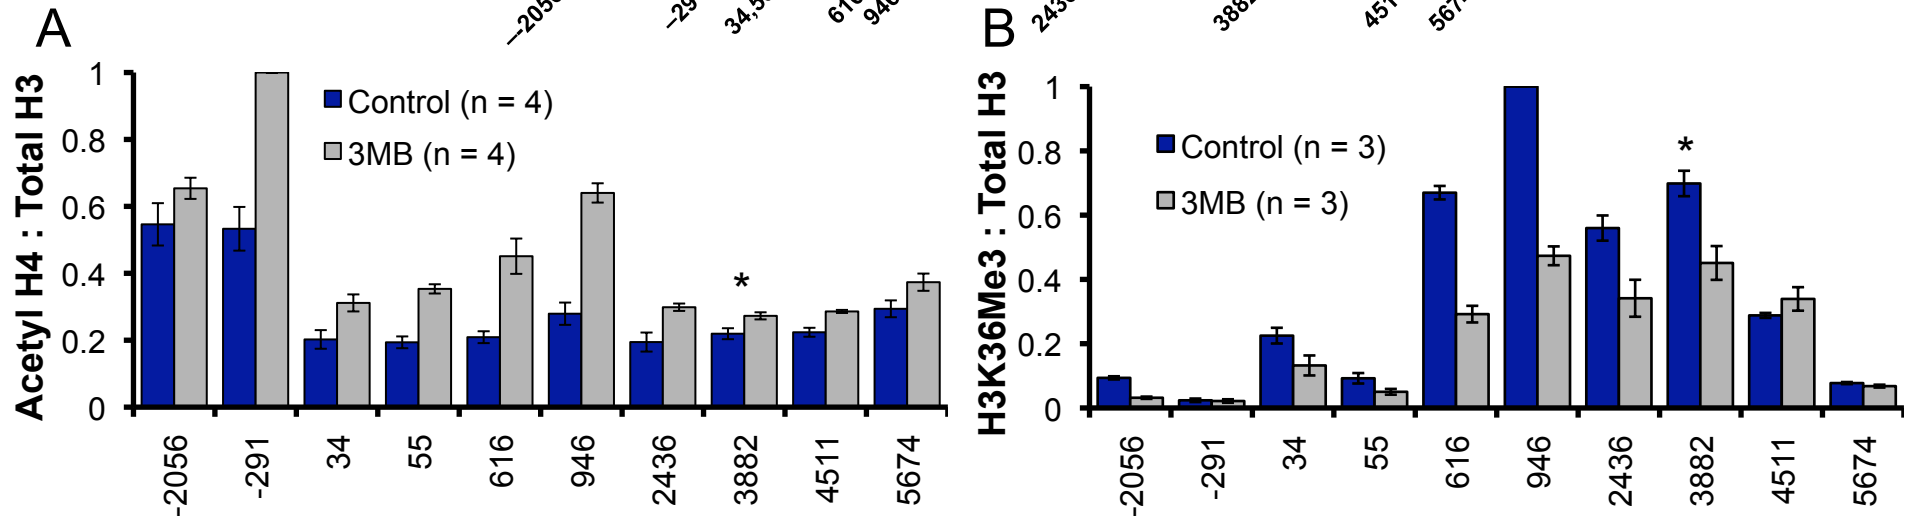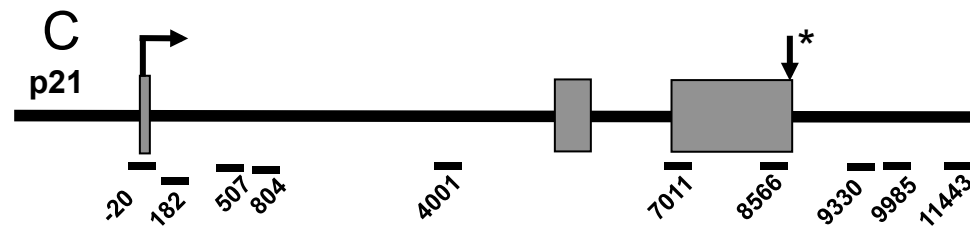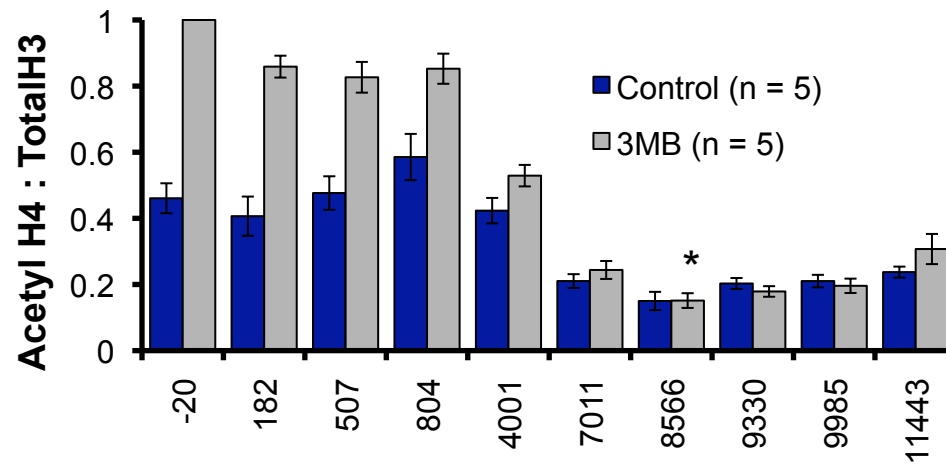

# Glover Fig. S5

**A**

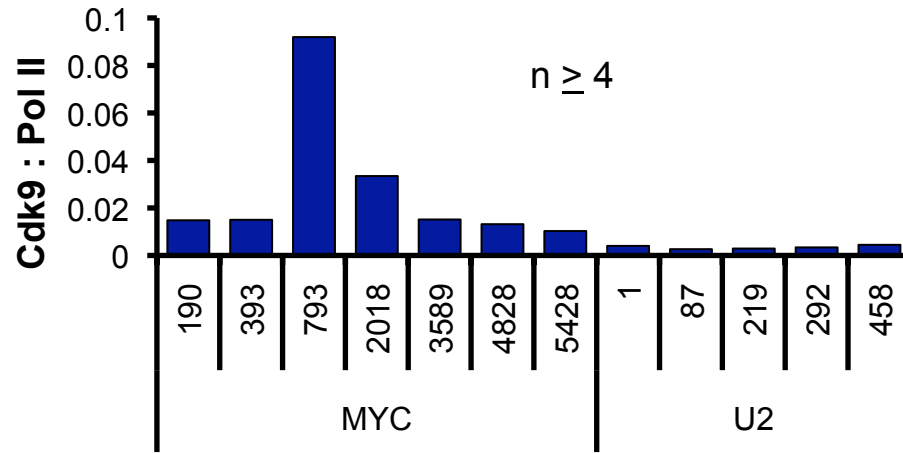

**B**

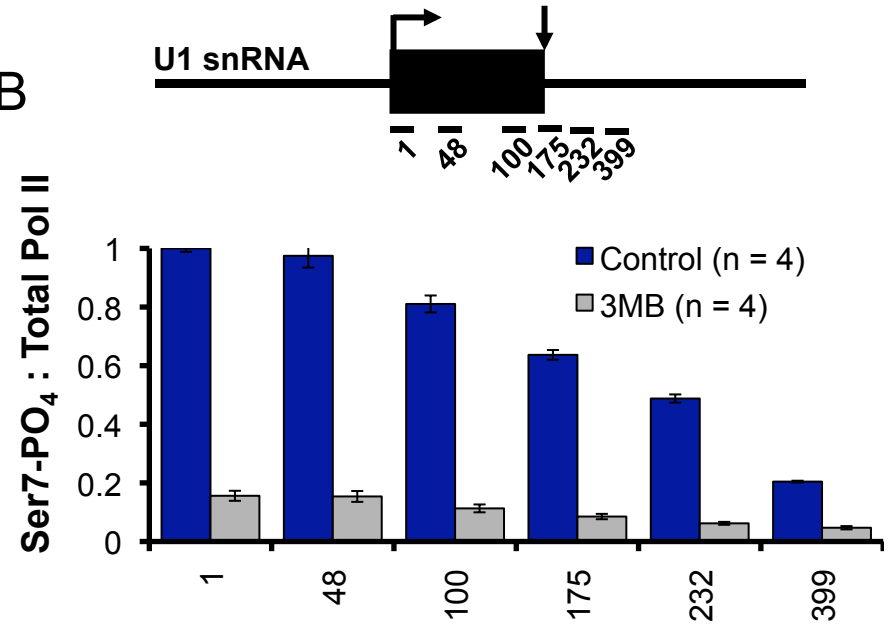

**C**

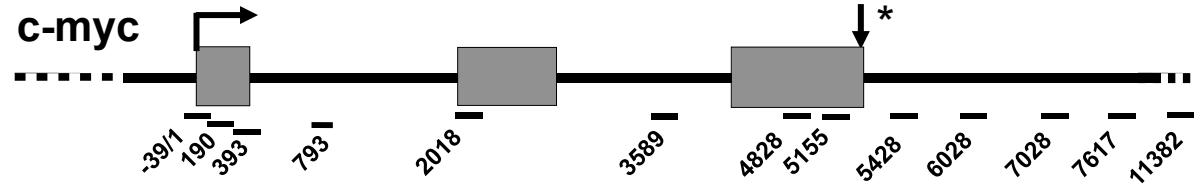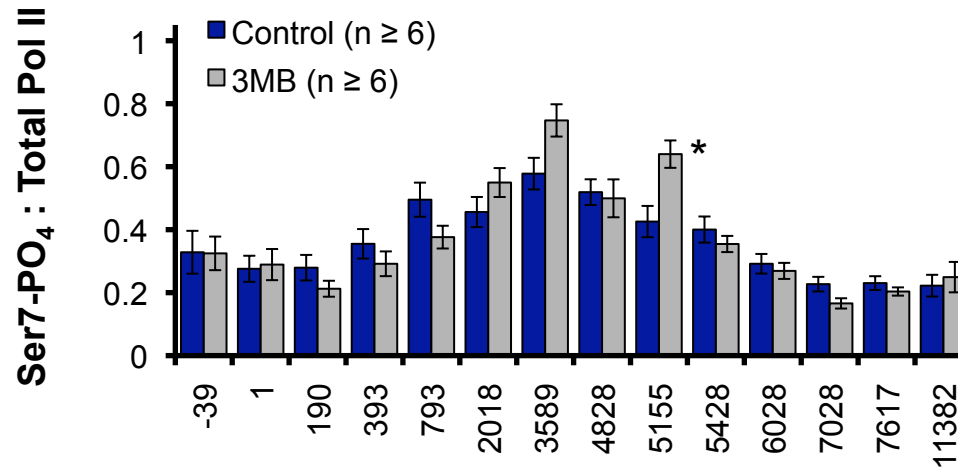

**SUPPLEMENTARY FIGURE LEGENDS**

**Figure S1.** A) **3-MB-PP1 does not affect transcription in wild type cells.** Relative ChIP signals for pol II along the c-myc gene in wild type HCT116 cells (WT) before and after 3-MB-PP1 treatment. Means and s.e.m.'s are shown.

**B) Suppression of c-myc promoter-proximal pausing after 2 or 8 hr treatment of HCT116 *Cdk7<sup>as/as</sup>* cells with 3-MB-PP1.** Relative ChIP signals for pol II are shown.

**C) Cell cycle arrest does not alter promoter-proximal pausing on c-myc.** Relative ChIP signal ratios of total pol II on c-myc in HCT116 *Cdk7<sup>as/as</sup>* control cells and cells arrested at G1/S by serum starvation (0.5% FBS 24 hr) followed by release into 10% serum +2mM hydroxyurea for 8hr before cross-linking.

**Figure S2.** A) **3-MB-PP1 does not affect pol II distribution on p21 in wild type cells.** Relative ChIP signals for pol II along the p21 gene activated with doxorubicin (Dox) in wild type HCT116 cells (WT) before and after 3-MB-PP1 treatment.

**B) *Cdk7* inhibition depresses paused polymerase on the uninduced p21 gene.** Relative pol II ChIP signals before and after 3-MB-PP1 treatment in HCT116 *Cdk7<sup>as/as</sup>* cells. Means and s.e.m.'s are shown.

**Figure S3.** A, B) ***Cdk7* inactivation suppresses promoter-proximal pausing on uninduced c-fos and GAPDH.** Relative pol II ChIP signals + and - 3-MB-PP1 in HCT116 *Cdk7<sup>as/as</sup>* cells normalized to the maximal signal in each data set. Means and s.e.m.'s are shown.

**C) Effects of Cdk7 inhibition on mRNA abundance.** Total RNA from HCT116 *Cdk7<sup>as/as</sup>* cells + and - 3-MB-PP1 (8hr) was analyzed by real time RT-PCR (see Methods). Cdk7 inhibition reduced the abundance of c-myc but not p21 or GAPDH relative to the mitochondrial CoxIII control.

**D) Cdk7 inhibition does not reduce Cdk9 recruitment to the c-myc promoter.**

Relative Cdk9 ChIP signals before and after 3-MB-PP1 treatment in HCT116 *Cdk7<sup>as/as</sup>* cells. Means and s.e.m.'s are shown after normalization to 3MB sample.

**Figure S4. Inhibition of Cdk7 enhances H4 acetylation and decreases H3K36 trimethylation.** Normalized ChIP signals on GAPDH and uninduced p21 are expressed relative to total histone H3 in HCT116 *Cdk7<sup>as/as</sup>* cells - (control) and + 3-MB-PP1 (3MB). Means and s.e.m.'s are shown.

**Figure S5. A) Low levels of Cdk9 at the U2 snRNA gene relative to c-myc.** Ratios of Cdk9:pol II ChIP signals in arbitrary units are shown for several amplicons at the c-myc and U2 genes in untreated HCT116 *Cdk7<sup>as/as</sup>* cells.

**B, C) Inhibition of Cdk7 inhibits CTD Ser7 phosphorylation on the U1 snRNA gene but not c-myc.** Normalized Ser7-P ChIP signals on the U1 snRNA and c-myc genes are expressed relative to total pol II in HCT116 *Cdk7<sup>as/as</sup>* cells - (control) and + 3-MB-PP1 (3MB). Means and s.e.m.'s are shown.
